# Supplementary material for: Short-Term Exercise Training Does Not Stimulate Skeletal Muscle ATP Synthesis in Relatives of Humans With Type 2 Diabetes
Source: Oxford University Press journal article supplement (doi:10.2337/db08-1240), 2009-03-05
Supplement: db08-1240_online_appendix.doc [file db08-1240_online_appendix.doc]

**Supplementary Table A1.** Nutrient intake during the intervention week (6-days dietary records) (means±SD, [95% CI]) in controls (CON) and first-degree relatives of type 2 diabetic patients (REL). Dietary data were not available from one relative who lost the dietary record.

|  | CON | REL |
| --- | --- | --- |
| Caloric intake (kcal/day) | 2045±577,  [1678-2412] | 1892±465,  [1691-2093] |
| % of daily energy intake:  Carbohydrate (%) | 46±8, [41-51] | 44±6, [41-46] |
| Fat (%) | 34±6, [30-38] | 35±5, [33-37] |
| Protein (%) | 17±3, [15-18] | 17±3, [16-18] |
| Saturated fat (%) | 14±3, [12-16] | 14±3, [13-15] |
| n-3 fatty acids (%) | 1±0, [1-1] | 1±0, [1-1] |
| n-6 fatty acids (%) | 5±1, [4-5] | 5±2, [5-6] |
| Cholesterol (g/day) | 0.33±0.12,  [0.26-0.41] | 0.32±0.11,  [0.27-0.37] |
